# Supplementary material for: Activation of PD-1 Protects Intestinal Immune Defense Through IL-10/miR-155 Pathway After Intestinal Ischemia Reperfusion
Source: Springer Nature journal article supplement (doi:10.1007/s10620-018-5282-2), 2018-09-11
Supplement: MOESM1 [file 16117412]

**Supplementary Data**

Gating strategy of lymphocytes isolation

1. Purity of the B220 isolation by MACS: 82-88%
2. Viability of cells after MACS: 91-97%
3. Single cell mode in FACS

4.

**
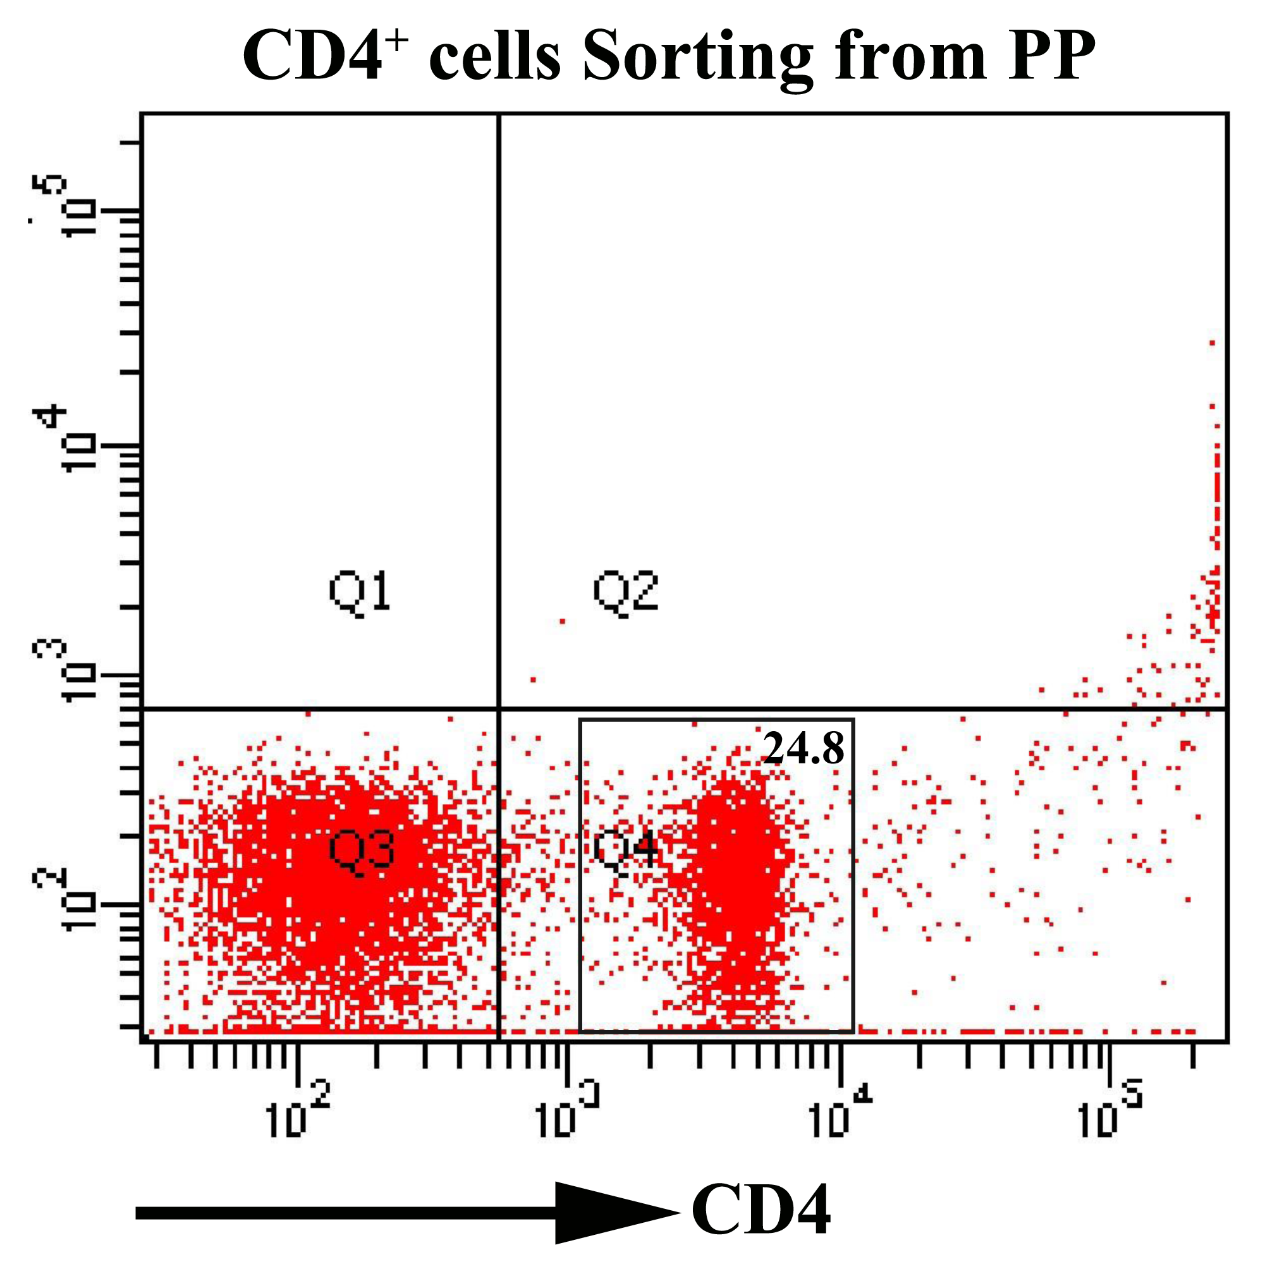
**
